# Supplementary material for: Gene expression patterns of novel visual and non-visual opsin families in immature and mature Japanese eel males
Source: PeerJ. 2020 Feb 27;8:e8326. doi: 10.7717/peerj.8326 (PMC7049458; doi:10.7717/peerj.8326)
Supplement: File S1 [file peerj-08-8326-s002.xlsx]

## Sheet: Text Report
Target ID	Target Name	Sample ID	Tissue	Sample Name	Ct Avg.(CP)	Rel.Qty(CP)
T001	Actin	S001	Fore	Mature-1	16.755	1
T001	Actin	S002	Fore	Mature-2	16.105	1
T001	Actin	S003	Fore	Mature-3	16.34	1
T001	Actin	S004	Fore	Mature-4	15.42	1
T001	Actin	S005	Fore	Mature-5	16.16	1
T001	Actin	S006	Fore	Mature-6	15.74	1
T001	Actin	S007	Fore	Immature-1	15.68	1
T001	Actin	S008	Fore	Immature-2	16.165	1
T001	Actin	S009	Fore	Immature-3	16.03	1
T001	Actin	S010	Fore	Immature-4	16.365	1
T001	Actin	S011	Fore	Immature-5	16.49	1
T001	Actin	S012	Fore	Immature-6	17.7	1
T001	Actin	S013	Mid	Mature-1	17.105	1
T001	Actin	S014	Mid	Mature-2	16.98	1
T001	Actin	S015	Mid	Mature-3	16.61	1
T001	Actin	S016	Mid	Mature-4	16.92	1
T001	Actin	S017	Mid	Mature-5	16.34	1
T001	Actin	S018	Mid	Mature-6	15.83	1
T001	Actin	S019	Mid	Immature-1	15.785	1
T001	Actin	S020	Mid	Immature-2	16.23	1
T001	Actin	S021	Mid	Immature-3	15.785	1
T001	Actin	S022	Mid	Immature-4	16.24	1
T001	Actin	S023	Mid	Immature-5	16.545	1
T001	Actin	S024	Mid	Immature-6	16.715	1
T001	Actin	S025	Hind	Mature-1	16.83	1
T001	Actin	S026	Hind	Mature-2	16.93	1
T001	Actin	S027	Hind	Mature-3	17.04	1
T001	Actin	S028	Hind	Mature-4	16.67	1
T001	Actin	S029	Hind	Mature-5	16.655	1
T001	Actin	S030	Hind	Mature-6	16.49	1
T001	Actin	S031	Hind	Immature-1	16.135	1
T001	Actin	S032	Hind	Immature-2	16.18	1
T001	Actin	S033	Hind	Immature-3	16.22	1
T001	Actin	S034	Hind	Immature-4	16.585	1
T001	Actin	S035	Hind	Immature-5	16.6	1
T001	Actin	S036	Hind	Immature-6	16.68	1
T002	DSO	S001	Fore	Mature-1	30.61	0.3231
T002	DSO	S002	Fore	Mature-2	30.745	0.1875
T002	DSO	S003	Fore	Mature-3	29.105	0.6878
T002	DSO	S004	Fore	Mature-4	28.61	0.5123
T002	DSO	S005	Fore	Mature-5	28.86	0.7195
T002	DSO	S006	Fore	Mature-6	29.105	0.4538
T002	DSO	S007	Fore	Immature-1	29.545	0.3209
T002	DSO	S008	Fore	Immature-2	31.015	0.1621
T002	DSO	S009	Fore	Immature-3	30.765	0.1756
T002	DSO	S010	Fore	Immature-4	31.13	0.1719
T002	DSO	S011	Fore	Immature-5	31.28	0.169
T002	DSO	S012	Fore	Immature-6	--	--
T002	DSO	S013	Mid	Mature-1	30.265	0.523
T002	DSO	S014	Mid	Mature-2	30.21	0.4983
T002	DSO	S015	Mid	Mature-3	28.98	0.9044
T002	DSO	S016	Mid	Mature-4	29.005	1.102
T002	DSO	S017	Mid	Mature-5	29.02	0.7295
T002	DSO	S018	Mid	Mature-6	27.645	1.329
T002	DSO	S019	Mid	Immature-1	29.49	0.3585
T002	DSO	S020	Mid	Immature-2	29.055	0.6598
T002	DSO	S021	Mid	Immature-3	29.505	0.3548
T002	DSO	S022	Mid	Immature-4	31.03	0.169
T002	DSO	S023	Mid	Immature-5	31.56	0.1446
T002	DSO	S024	Mid	Immature-6	33.76	0.0354
T002	DSO	S025	Hind	Mature-1	31.11	0.2406
T002	DSO	S026	Hind	Mature-2	32.895	0.07484
T002	DSO	S027	Hind	Mature-3	31.395	0.2285
T002	DSO	S028	Hind	Mature-4	31.23	0.1982
T002	DSO	S029	Hind	Mature-5	29.93	0.483
T002	DSO	S030	Hind	Mature-6	29.755	0.4863
T002	DSO	S031	Hind	Immature-1	30.55	0.2192
T002	DSO	S032	Hind	Immature-2	31.04	0.161
T002	DSO	S033	Hind	Immature-3	31.335	0.1349
T002	DSO	S034	Hind	Immature-4	32.1	0.1022
T002	DSO	S035	Hind	Immature-5	33.22	0.04753
T002	DSO	S036	Hind	Immature-6	32.47	0.08449
T003	Exo-Rhod	S001	Fore	Mature-1	27.53	0.5548
T003	Exo-Rhod	S002	Fore	Mature-2	--	--
T003	Exo-Rhod	S003	Fore	Mature-3	25.345	1.892
T003	Exo-Rhod	S004	Fore	Mature-4	--	--
T003	Exo-Rhod	S005	Fore	Mature-5	27.57	0.3572
T003	Exo-Rhod	S006	Fore	Mature-6	--	--
T003	Exo-Rhod	S007	Fore	Immature-1	36.5	0.0005251
T003	Exo-Rhod	S008	Fore	Immature-2	28.06	0.2553
T003	Exo-Rhod	S009	Fore	Immature-3	29.425	0.09025
T003	Exo-Rhod	S010	Fore	Immature-4	--	--
T003	Exo-Rhod	S011	Fore	Immature-5	--	--
T003	Exo-Rhod	S012	Fore	Immature-6	--	--
T003	Exo-Rhod	S013	Mid	Mature-1	--	--
T003	Exo-Rhod	S014	Mid	Mature-2	30.21	0.1012
T003	Exo-Rhod	S015	Mid	Mature-3	28.42	0.2707
T003	Exo-Rhod	S016	Mid	Mature-4	31.4	0.04254
T003	Exo-Rhod	S017	Mid	Mature-5	--	--
T003	Exo-Rhod	S018	Mid	Mature-6	31.64	0.01692
T003	Exo-Rhod	S019	Mid	Immature-1	28.88	0.1111
T003	Exo-Rhod	S020	Mid	Immature-2	36.235	0.0009239
T003	Exo-Rhod	S021	Mid	Immature-3	--	--
T003	Exo-Rhod	S022	Mid	Immature-4	33.63	0.00566
T003	Exo-Rhod	S023	Mid	Immature-5	28.645	0.2214
T003	Exo-Rhod	S024	Mid	Immature-6	29.71	0.1191
T003	Exo-Rhod	S025	Hind	Mature-1	36.395	0.001253
T003	Exo-Rhod	S026	Hind	Mature-2	37.1	0.000824
T003	Exo-Rhod	S027	Hind	Mature-3	--	--
T003	Exo-Rhod	S028	Hind	Mature-4	--	--
T003	Exo-Rhod	S029	Hind	Mature-5	35.08	0.002762
T003	Exo-Rhod	S030	Hind	Mature-6	--	--
T003	Exo-Rhod	S031	Hind	Immature-1	35.7	0.001253
T003	Exo-Rhod	S032	Hind	Immature-2	36.355	0.0008212
T003	Exo-Rhod	S033	Hind	Immature-3	35.725	0.001307
T003	Exo-Rhod	S034	Hind	Immature-4	37.5	0.0004917
T003	Exo-Rhod	S035	Hind	Immature-5	35.775	0.001642
T003	Exo-Rhod	S036	Hind	Immature-6	36.21	0.001284
T004	FWO	S001	Fore	Mature-1	33.635	1.747
T004	FWO	S002	Fore	Mature-2	33.105	1.608
T004	FWO	S003	Fore	Mature-3	33.855	1.125
T004	FWO	S004	Fore	Mature-4	34.76	0.3175
T004	FWO	S005	Fore	Mature-5	34.215	0.7738
T004	FWO	S006	Fore	Mature-6	34.005	0.669
T004	FWO	S007	Fore	Immature-1	35.55	0.2199
T004	FWO	S008	Fore	Immature-2	34.6	0.5946
T004	FWO	S009	Fore	Immature-3	34.35	0.6439
T004	FWO	S010	Fore	Immature-4	35.505	0.3648
T004	FWO	S011	Fore	Immature-5	34.3	0.917
T004	FWO	S012	Fore	Immature-6	34.38	2.007
T004	FWO	S013	Mid	Mature-1	35.615	0.5645
T004	FWO	S014	Mid	Mature-2	35	0.7928
T004	FWO	S015	Mid	Mature-3	--	--
T004	FWO	S016	Mid	Mature-4	35.71	0.4649
T004	FWO	S017	Mid	Mature-5	35.86	0.2803
T004	FWO	S018	Mid	Mature-6	--	--
T004	FWO	S019	Mid	Immature-1	--	--
T004	FWO	S020	Mid	Immature-2	35.93	0.2474
T004	FWO	S021	Mid	Immature-3	34.16	0.6199
T004	FWO	S022	Mid	Immature-4	34.985	0.4796
T004	FWO	S023	Mid	Immature-5	33.425	1.747
T004	FWO	S024	Mid	Immature-6	34.31	1.064
T004	FWO	S025	Hind	Mature-1	--	--
T004	FWO	S026	Hind	Mature-2	--	--
T004	FWO	S027	Hind	Mature-3	36.05	0.3991
T004	FWO	S028	Hind	Mature-4	--	--
T004	FWO	S029	Hind	Mature-5	--	--
T004	FWO	S030	Hind	Mature-6	--	--
T004	FWO	S031	Hind	Immature-1	--	--
T004	FWO	S032	Hind	Immature-2	--	--
T004	FWO	S033	Hind	Immature-3	--	--
T004	FWO	S034	Hind	Immature-4	35.485	0.4308
T004	FWO	S035	Hind	Immature-5	33.18	2.151
T004	FWO	S036	Hind	Immature-6	35.265	0.5359
T005	Rh2	S001	Fore	Mature-1	35.145	0.2088
T005	Rh2	S002	Fore	Mature-2	36.28	0.06058
T005	Rh2	S003	Fore	Mature-3	35.015	0.1713
T005	Rh2	S004	Fore	Mature-4	34.29	0.1497
T005	Rh2	S005	Fore	Mature-5	35.59	0.1015
T005	Rh2	S006	Fore	Mature-6	33.25	0.3842
T005	Rh2	S007	Fore	Immature-1	33.13	0.4005
T005	Rh2	S008	Fore	Immature-2	33.63	0.3964
T005	Rh2	S009	Fore	Immature-3	36.41	0.05256
T005	Rh2	S010	Fore	Immature-4	35.38	0.1354
T005	Rh2	S011	Fore	Immature-5	34.57	0.2588
T005	Rh2	S012	Fore	Immature-6	37.45	0.08133
T005	Rh2	S013	Mid	Mature-1	34.09	0.5529
T005	Rh2	S014	Mid	Mature-2	36	0.1349
T005	Rh2	S015	Mid	Mature-3	34.155	0.375
T005	Rh2	S016	Mid	Mature-4	33.57	0.6974
T005	Rh2	S017	Mid	Mature-5	35.795	0.09979
T005	Rh2	S018	Mid	Mature-6	31.55	1.329
T005	Rh2	S019	Mid	Immature-1	31.905	1.007
T005	Rh2	S020	Mid	Immature-2	32.245	1.083
T005	Rh2	S021	Mid	Immature-3	35.195	0.1029
T005	Rh2	S022	Mid	Immature-4	35.29	0.1321
T005	Rh2	S023	Mid	Immature-5	35.835	0.1119
T005	Rh2	S024	Mid	Immature-6	35.78	0.1308
T005	Rh2	S025	Hind	Mature-1	33.33	0.7738
T005	Rh2	S026	Hind	Mature-2	34.84	0.2912
T005	Rh2	S027	Hind	Mature-3	36.68	0.08778
T005	Rh2	S028	Hind	Mature-4	32.475	1.253
T005	Rh2	S029	Hind	Mature-5	34.525	0.2994
T005	Rh2	S030	Hind	Mature-6	32.605	1.01
T005	Rh2	S031	Hind	Immature-1	31.975	1.223
T005	Rh2	S032	Hind	Immature-2	31.96	1.275
T005	Rh2	S033	Hind	Immature-3	36.82	0.04512
T005	Rh2	S034	Hind	Immature-4	34.7	0.2526
T005	Rh2	S035	Hind	Immature-5	36.605	0.06816
T005	Rh2	S036	Hind	Immature-6	35.23	0.1869
T006	Opn3	S001	Fore	Mature-1	34.955	0.02987
T006	Opn3	S002	Fore	Mature-2	35.24	0.01562
T006	Opn3	S003	Fore	Mature-3	31.905	0.1856
T006	Opn3	S004	Fore	Mature-4	32.155	0.08247
T006	Opn3	S005	Fore	Mature-5	31.855	0.1696
T006	Opn3	S006	Fore	Mature-6	32.905	0.06121
T006	Opn3	S007	Fore	Immature-1	31.445	0.1615
T006	Opn3	S008	Fore	Immature-2	32.945	0.07994
T006	Opn3	S009	Fore	Immature-3	33.675	0.04389
T006	Opn3	S010	Fore	Immature-4	34.7	0.0272
T006	Opn3	S011	Fore	Immature-5	37.96	0.003097
T006	Opn3	S012	Fore	Immature-6	--	--
T006	Opn3	S013	Mid	Mature-1	32.435	0.2184
T006	Opn3	S014	Mid	Mature-2	32.68	0.169
T006	Opn3	S015	Mid	Mature-3	31.375	0.3231
T006	Opn3	S016	Mid	Mature-4	30.61	0.6807
T006	Opn3	S017	Mid	Mature-5	29.235	1.181
T006	Opn3	S018	Mid	Mature-6	28.595	1.292
T006	Opn3	S019	Mid	Immature-1	28.555	1.288
T006	Opn3	S020	Mid	Immature-2	29.09	1.21
T006	Opn3	S021	Mid	Immature-3	29.075	0.8981
T006	Opn3	S022	Mid	Immature-4	30.765	0.3816
T006	Opn3	S023	Mid	Immature-5	31.725	0.2423
T006	Opn3	S024	Mid	Immature-6	34.87	0.03082
T006	Opn3	S025	Hind	Mature-1	31.82	0.2764
T006	Opn3	S026	Hind	Mature-2	34.535	0.04512
T006	Opn3	S027	Hind	Mature-3	31.92	0.2983
T006	Opn3	S028	Hind	Mature-4	31.27	0.3622
T006	Opn3	S029	Hind	Mature-5	29.85	0.9593
T006	Opn3	S030	Hind	Mature-6	30.98	0.3909
T006	Opn3	S031	Hind	Immature-1	30.83	0.3392
T006	Opn3	S032	Hind	Immature-2	30.38	0.478
T006	Opn3	S033	Hind	Immature-3	30.64	0.4104
T006	Opn3	S034	Hind	Immature-4	34.79	0.02977
T006	Opn3	S035	Hind	Immature-5	34.86	0.02866
T006	Opn3	S036	Hind	Immature-6	--	--
T007	Opn4m1	S001	Fore	Mature-1	31.995	0.3686
T007	Opn4m1	S002	Fore	Mature-2	31.13	0.4278
T007	Opn4m1	S003	Fore	Mature-3	30.095	1.032
T007	Opn4m1	S004	Fore	Mature-4	30.47	0.4204
T007	Opn4m1	S005	Fore	Mature-5	30.365	0.7552
T007	Opn4m1	S006	Fore	Mature-6	30.915	0.3856
T007	Opn4m1	S007	Fore	Immature-1	30.12	0.6417
T007	Opn4m1	S008	Fore	Immature-2	30.22	0.838
T007	Opn4m1	S009	Fore	Immature-3	30.28	0.732
T007	Opn4m1	S010	Fore	Immature-4	33.535	0.09672
T007	Opn4m1	S011	Fore	Immature-5	34.18	0.06745
T007	Opn4m1	S012	Fore	Immature-6	35.79	0.05112
T007	Opn4m1	S013	Mid	Mature-1	31.31	0.7552
T007	Opn4m1	S014	Mid	Mature-2	30.88	0.933
T007	Opn4m1	S015	Mid	Mature-3	29.945	1.38
T007	Opn4m1	S016	Mid	Mature-4	31.33	0.6552
T007	Opn4m1	S017	Mid	Mature-5	30.59	0.732
T007	Opn4m1	S018	Mid	Mature-6	29.705	0.9493
T007	Opn4m1	S019	Mid	Immature-1	29.8	0.8615
T007	Opn4m1	S020	Mid	Immature-2	30.495	0.7245
T007	Opn4m1	S021	Mid	Immature-3	29.22	1.288
T007	Opn4m1	S022	Mid	Immature-4	31.515	0.3597
T007	Opn4m1	S023	Mid	Immature-5	31.595	0.4204
T007	Opn4m1	S024	Mid	Immature-6	33.14	0.1621
T007	Opn4m1	S025	Hind	Mature-1	34.595	0.06403
T007	Opn4m1	S026	Hind	Mature-2	34.73	0.0625
T007	Opn4m1	S027	Hind	Mature-3	34.765	0.06584
T007	Opn4m1	S028	Hind	Mature-4	33.085	0.1632
T007	Opn4m1	S029	Hind	Mature-5	31.12	0.6307
T007	Opn4m1	S030	Hind	Mature-6	33.085	0.1441
T007	Opn4m1	S031	Hind	Immature-1	32.525	0.1661
T007	Opn4m1	S032	Hind	Immature-2	32.2	0.2146
T007	Opn4m1	S033	Hind	Immature-3	31.98	0.257
T007	Opn4m1	S034	Hind	Immature-4	33.46	0.1187
T007	Opn4m1	S035	Hind	Immature-5	33.89	0.089
T007	Opn4m1	S036	Hind	Immature-6	35.86	0.02401
T008	Opn4m2	S001	Fore	Mature-1	32.04	0.3287
T008	Opn4m2	S002	Fore	Mature-2	32.16	0.1928
T008	Opn4m2	S003	Fore	Mature-3	29.1	1.892
T008	Opn4m2	S004	Fore	Mature-4	29.475	0.7711
T008	Opn4m2	S005	Fore	Mature-5	29.8	1.028
T008	Opn4m2	S006	Fore	Mature-6	31.125	0.3067
T008	Opn4m2	S007	Fore	Immature-1	31.135	0.2922
T008	Opn4m2	S008	Fore	Immature-2	30.935	0.4698
T008	Opn4m2	S009	Fore	Immature-3	31.575	0.2745
T008	Opn4m2	S010	Fore	Immature-4	35.53	0.02233
T008	Opn4m2	S011	Fore	Immature-5	35.88	0.0191
T008	Opn4m2	S012	Fore	Immature-6	--	--
T008	Opn4m2	S013	Mid	Mature-1	35.075	0.05112
T008	Opn4m2	S014	Mid	Mature-2	32.7	0.2432
T008	Opn4m2	S015	Mid	Mature-3	30.98	0.6199
T008	Opn4m2	S016	Mid	Mature-4	32.53	0.2624
T008	Opn4m2	S017	Mid	Mature-5	31.475	0.3648
T008	Opn4m2	S018	Mid	Mature-6	30.44	0.5249
T008	Opn4m2	S019	Mid	Immature-1	32.1	0.161
T008	Opn4m2	S020	Mid	Immature-2	33.96	0.06037
T008	Opn4m2	S021	Mid	Immature-3	33.5	0.061
T008	Opn4m2	S022	Mid	Immature-4	33.7	0.0728
T008	Opn4m2	S023	Mid	Immature-5	34.62	0.04753
T008	Opn4m2	S024	Mid	Immature-6	38.54	0.003533
T008	Opn4m2	S025	Hind	Mature-1	36.19	0.01951
T008	Opn4m2	S026	Hind	Mature-2	35.285	0.03915
T008	Opn4m2	S027	Hind	Mature-3	33.65	0.1312
T008	Opn4m2	S028	Hind	Mature-4	33.68	0.09944
T008	Opn4m2	S029	Hind	Mature-5	33.32	0.1263
T008	Opn4m2	S030	Hind	Mature-6	32.03	0.2755
T008	Opn4m2	S031	Hind	Immature-1	32.56	0.1492
T008	Opn4m2	S032	Hind	Immature-2	33.35	0.089
T008	Opn4m2	S033	Hind	Immature-3	31.99	0.2349
T008	Opn4m2	S034	Hind	Immature-4	35.46	0.0273
T008	Opn4m2	S035	Hind	Immature-5	37.02	0.009355
T008	Opn4m2	S036	Hind	Immature-6	--	--
T009	Opn4x1	S001	Fore	Mature-1	33.705	0.331
T009	Opn4x1	S002	Fore	Mature-2	--	--
T009	Opn4x1	S003	Fore	Mature-3	--	--
T009	Opn4x1	S004	Fore	Mature-4	--	--
T009	Opn4x1	S005	Fore	Mature-5	--	--
T009	Opn4x1	S006	Fore	Mature-6	32.885	0.2892
T009	Opn4x1	S007	Fore	Immature-1	--	--
T009	Opn4x1	S008	Fore	Immature-2	35.48	0.06426
T009	Opn4x1	S009	Fore	Immature-3	31.795	0.7526
T009	Opn4x1	S010	Fore	Immature-4	33.675	0.2579
T009	Opn4x1	S011	Fore	Immature-5	--	--
T009	Opn4x1	S012	Fore	Immature-6	33.11	0.9626
T009	Opn4x1	S013	Mid	Mature-1	32.595	0.9107
T009	Opn4x1	S014	Mid	Mature-2	--	--
T009	Opn4x1	S015	Mid	Mature-3	--	--
T009	Opn4x1	S016	Mid	Mature-4	--	--
T009	Opn4x1	S017	Mid	Mature-5	--	--
T009	Opn4x1	S018	Mid	Mature-6	32.275	0.4698
T009	Opn4x1	S019	Mid	Immature-1	--	--
T009	Opn4x1	S020	Mid	Immature-2	36.435	0.03467
T009	Opn4x1	S021	Mid	Immature-3	30.985	1.113
T009	Opn4x1	S022	Mid	Immature-4	32.46	0.549
T009	Opn4x1	S023	Mid	Immature-5	--	--
T009	Opn4x1	S024	Mid	Immature-6	32.335	0.8322
T009	Opn4x1	S025	Hind	Mature-1	32.45	0.8322
T009	Opn4x1	S026	Hind	Mature-2	--	--
T009	Opn4x1	S027	Hind	Mature-3	--	--
T009	Opn4x1	S028	Hind	Mature-4	--	--
T009	Opn4x1	S029	Hind	Mature-5	--	--
T009	Opn4x1	S030	Hind	Mature-6	33.25	0.3776
T009	Opn4x1	S031	Hind	Immature-1	--	--
T009	Opn4x1	S032	Hind	Immature-2	35.86	0.04989
T009	Opn4x1	S033	Hind	Immature-3	30.775	1.741
T009	Opn4x1	S034	Hind	Immature-4	33.4	0.3635
T009	Opn4x1	S035	Hind	Immature-5	--	--
T009	Opn4x1	S036	Hind	Immature-6	33.72	0.311
T010	Opn4x2	S001	Fore	Mature-1	31.205	0.2088
T010	Opn4x2	S002	Fore	Mature-2	32.37	0.05933
T010	Opn4x2	S003	Fore	Mature-3	29.865	0.3964
T010	Opn4x2	S004	Fore	Mature-4	30.3	0.155
T010	Opn4x2	S005	Fore	Mature-5	31.39	0.1216
T010	Opn4x2	S006	Fore	Mature-6	30.28	0.1961
T010	Opn4x2	S007	Fore	Immature-1	29.9	0.2449
T010	Opn4x2	S008	Fore	Immature-2	30.815	0.1817
T010	Opn4x2	S009	Fore	Immature-3	30.36	0.2269
T010	Opn4x2	S010	Fore	Immature-4	31.11	0.1702
T010	Opn4x2	S011	Fore	Immature-5	31.4	0.1518
T010	Opn4x2	S012	Fore	Immature-6	30.63	0.5987
T010	Opn4x2	S013	Mid	Mature-1	30.595	0.4061
T010	Opn4x2	S014	Mid	Mature-2	29.645	0.7195
T010	Opn4x2	S015	Mid	Mature-3	28.365	1.352
T010	Opn4x2	S016	Mid	Mature-4	31.425	0.201
T010	Opn4x2	S017	Mid	Mature-5	30.58	0.2415
T010	Opn4x2	S018	Mid	Mature-6	29.37	0.3923
T010	Opn4x2	S019	Mid	Immature-1	29.26	0.4104
T010	Opn4x2	S020	Mid	Immature-2	28.95	0.6926
T010	Opn4x2	S021	Mid	Immature-3	28.525	0.683
T010	Opn4x2	S022	Mid	Immature-4	28.795	0.7765
T010	Opn4x2	S023	Mid	Immature-5	30.93	0.2184
T010	Opn4x2	S024	Mid	Immature-6	31.99	0.1178
T010	Opn4x2	S025	Hind	Mature-1	31.68	0.1582
T010	Opn4x2	S026	Hind	Mature-2	31.02	0.2679
T010	Opn4x2	S027	Hind	Mature-3	29.285	0.9626
T010	Opn4x2	S028	Hind	Mature-4	34.72	0.01722
T010	Opn4x2	S029	Hind	Mature-5	30.885	0.2432
T010	Opn4x2	S030	Hind	Mature-6	32.265	0.08333
T010	Opn4x2	S031	Hind	Immature-1	30.155	0.2813
T010	Opn4x2	S032	Hind	Immature-2	28.365	1.003
T010	Opn4x2	S033	Hind	Immature-3	27.61	1.741
T010	Opn4x2	S034	Hind	Immature-4	28.79	0.9897
T010	Opn4x2	S035	Hind	Immature-5	29.865	0.4747
T010	Opn4x2	S036	Hind	Immature-6	32.91	0.06079
T011	Opn5	S001	Fore	Mature-1	34.165	0.3046
T011	Opn5	S002	Fore	Mature-2	33.745	0.2597
T011	Opn5	S003	Fore	Mature-3	32.39	0.7819
T011	Opn5	S004	Fore	Mature-4	33.87	0.1481
T011	Opn5	S005	Fore	Mature-5	33.885	0.2449
T011	Opn5	S006	Fore	Mature-6	34.315	0.1358
T011	Opn5	S007	Fore	Immature-1	32.67	0.4075
T011	Opn5	S008	Fore	Immature-2	33.845	0.2526
T011	Opn5	S009	Fore	Immature-3	32.755	0.4897
T011	Opn5	S010	Fore	Immature-4	34.14	0.2365
T011	Opn5	S011	Fore	Immature-5	34.87	0.1555
T011	Opn5	S012	Fore	Immature-6	--	--
T011	Opn5	S013	Mid	Mature-1	33.08	0.8236
T011	Opn5	S014	Mid	Mature-2	33.8	0.4585
T011	Opn5	S015	Mid	Mature-3	32.23	1.053
T011	Opn5	S016	Mid	Mature-4	33.4	0.5804
T011	Opn5	S017	Mid	Mature-5	32.205	0.8888
T011	Opn5	S018	Mid	Mature-6	32.94	0.375
T011	Opn5	S019	Mid	Immature-1	31.115	1.288
T011	Opn5	S020	Mid	Immature-2	31.84	1.061
T011	Opn5	S021	Mid	Immature-3	31.465	1.01
T011	Opn5	S022	Mid	Immature-4	31.895	1.028
T011	Opn5	S023	Mid	Immature-5	32.47	0.8526
T011	Opn5	S024	Mid	Immature-6	34.79	0.1921
T011	Opn5	S025	Hind	Mature-1	34.53	0.2491
T011	Opn5	S026	Hind	Mature-2	36.045	0.09343
T011	Opn5	S027	Hind	Mature-3	34.04	0.4047
T011	Opn5	S028	Hind	Mature-4	34.94	0.1678
T011	Opn5	S029	Hind	Mature-5	34.91	0.1696
T011	Opn5	S030	Hind	Mature-6	35.47	0.1026
T011	Opn5	S031	Hind	Immature-1	34.57	0.1497
T011	Opn5	S032	Hind	Immature-2	34.675	0.1436
T011	Opn5	S033	Hind	Immature-3	34.305	0.1908
T011	Opn5	S034	Hind	Immature-4	34.325	0.2423
T011	Opn5	S035	Hind	Immature-5	36.89	0.04138
T011	Opn5	S036	Hind	Immature-6	37.34	0.03202
T012	Opn5-like	S001	Fore	Mature-1	30.82	0.2509
T012	Opn5-like	S002	Fore	Mature-2	31.37	0.1092
T012	Opn5-like	S003	Fore	Mature-3	28.65	0.8467
T012	Opn5-like	S004	Fore	Mature-4	31.05	0.08479
T012	Opn5-like	S005	Fore	Mature-5	30.51	0.2059
T012	Opn5-like	S006	Fore	Mature-6	31.355	0.08567
T012	Opn5-like	S007	Fore	Immature-1	30.18	0.1856
T012	Opn5-like	S008	Fore	Immature-2	30.61	0.1928
T012	Opn5-like	S009	Fore	Immature-3	30.135	0.244
T012	Opn5-like	S010	Fore	Immature-4	30.98	0.1713
T012	Opn5-like	S011	Fore	Immature-5	31.465	0.1335
T012	Opn5-like	S012	Fore	Immature-6	30.95	0.4414
T012	Opn5-like	S013	Mid	Mature-1	29.125	1.035
T012	Opn5-like	S014	Mid	Mature-2	28.645	1.324
T012	Opn5-like	S015	Mid	Mature-3	27.605	2.107
T012	Opn5-like	S016	Mid	Mature-4	28.95	1.028
T012	Opn5-like	S017	Mid	Mature-5	28.26	1.11
T012	Opn5-like	S018	Mid	Mature-6	27.49	1.329
T012	Opn5-like	S019	Mid	Immature-1	28.58	0.605
T012	Opn5-like	S020	Mid	Immature-2	28.36	0.9593
T012	Opn5-like	S021	Mid	Immature-3	27.655	1.149
T012	Opn5-like	S022	Mid	Immature-4	27.925	1.306
T012	Opn5-like	S023	Mid	Immature-5	28.24	1.297
T012	Opn5-like	S024	Mid	Immature-6	28.675	1.079
T012	Opn5-like	S025	Hind	Mature-1	31.01	0.2316
T012	Opn5-like	S026	Hind	Mature-2	32.67	0.07856
T012	Opn5-like	S027	Hind	Mature-3	30.725	0.3265
T012	Opn5-like	S028	Hind	Mature-4	31.815	0.1187
T012	Opn5-like	S029	Hind	Mature-5	30.815	0.2349
T012	Opn5-like	S030	Hind	Mature-6	30.92	0.1948
T012	Opn5-like	S031	Hind	Immature-1	32.175	0.06381
T012	Opn5-like	S032	Hind	Immature-2	30.84	0.1661
T012	Opn5-like	S033	Hind	Immature-3	31.45	0.1119
T012	Opn5-like	S034	Hind	Immature-4	30.66	0.2491
T012	Opn5-like	S035	Hind	Immature-5	31.32	0.1593
T012	Opn5-like	S036	Hind	Immature-6	32.07	0.1001
T013	Parapinopsin	S001	Fore	Mature-1	31.315	1.266
T013	Parapinopsin	S002	Fore	Mature-2	--	--
T013	Parapinopsin	S003	Fore	Mature-3	30.32	1.892
T013	Parapinopsin	S004	Fore	Mature-4	--	--
T013	Parapinopsin	S005	Fore	Mature-5	30.485	1.49
T013	Parapinopsin	S006	Fore	Mature-6	35.45	0.03565
T013	Parapinopsin	S007	Fore	Immature-1	33.77	0.1096
T013	Parapinopsin	S008	Fore	Immature-2	33.365	0.2031
T013	Parapinopsin	S009	Fore	Immature-3	33.43	0.1768
T013	Parapinopsin	S010	Fore	Immature-4	--	--
T013	Parapinopsin	S011	Fore	Immature-5	--	--
T013	Parapinopsin	S012	Fore	Immature-6	--	--
T013	Parapinopsin	S013	Mid	Mature-1	37.47	0.02264
T013	Parapinopsin	S014	Mid	Mature-2	35.26	0.09605
T013	Parapinopsin	S015	Mid	Mature-3	33.885	0.1928
T013	Parapinopsin	S016	Mid	Mature-4	35.63	0.0713
T013	Parapinopsin	S017	Mid	Mature-5	35.2	0.06426
T013	Parapinopsin	S018	Mid	Mature-6	33.22	0.178
T013	Parapinopsin	S019	Mid	Immature-1	33.77	0.1178
T013	Parapinopsin	S020	Mid	Immature-2	36.455	0.02495
T013	Parapinopsin	S021	Mid	Immature-3	35.935	0.02628
T013	Parapinopsin	S022	Mid	Immature-4	36.31	0.02778
T013	Parapinopsin	S023	Mid	Immature-5	36.495	0.03019
T013	Parapinopsin	S024	Mid	Immature-6	38.395	0.0091
T013	Parapinopsin	S025	Hind	Mature-1	36.27	0.04299
T013	Parapinopsin	S026	Hind	Mature-2	--	--
T013	Parapinopsin	S027	Hind	Mature-3	38.39	0.01144
T013	Parapinopsin	S028	Hind	Mature-4	37.53	0.01606
T013	Parapinopsin	S029	Hind	Mature-5	36.015	0.04544
T013	Parapinopsin	S030	Hind	Mature-6	37.05	0.01978
T013	Parapinopsin	S031	Hind	Immature-1	35.57	0.04313
T013	Parapinopsin	S032	Hind	Immature-2	35.75	0.03928
T013	Parapinopsin	S033	Hind	Immature-3	36.54	0.02336
T013	Parapinopsin	S034	Hind	Immature-4	35.85	0.04853
T013	Parapinopsin	S035	Hind	Immature-5	--	--
T013	Parapinopsin	S036	Hind	Immature-6	--	--
T014	Peropsin	S001	Fore	Mature-1	28.855	0.5453
T014	Peropsin	S002	Fore	Mature-2	28.845	0.3499
T014	Peropsin	S003	Fore	Mature-3	27.87	0.8094
T014	Peropsin	S004	Fore	Mature-4	29.01	0.1941
T014	Peropsin	S005	Fore	Mature-5	28.205	0.5664
T014	Peropsin	S006	Fore	Mature-6	30.25	0.1026
T014	Peropsin	S007	Fore	Immature-1	27.445	0.6878
T014	Peropsin	S008	Fore	Immature-2	27.41	0.9862
T014	Peropsin	S009	Fore	Immature-3	28.815	0.3392
T014	Peropsin	S010	Fore	Immature-4	29.715	0.2293
T014	Peropsin	S011	Fore	Immature-5	32.61	0.03361
T014	Peropsin	S012	Fore	Immature-6	34.01	0.02946
T014	Peropsin	S013	Mid	Mature-1	28.835	0.7047
T014	Peropsin	S014	Mid	Mature-2	27.845	1.283
T014	Peropsin	S015	Mid	Mature-3	28.085	0.8409
T014	Peropsin	S016	Mid	Mature-4	29.405	0.4175
T014	Peropsin	S017	Mid	Mature-5	28.14	0.6713
T014	Peropsin	S018	Mid	Mature-6	28.745	0.3099
T014	Peropsin	S019	Mid	Immature-1	26.825	1.137
T014	Peropsin	S020	Mid	Immature-2	26.645	1.753
T014	Peropsin	S021	Mid	Immature-3	27.735	0.605
T014	Peropsin	S022	Mid	Immature-4	26.75	1.641
T014	Peropsin	S023	Mid	Immature-5	27.7	1.05
T014	Peropsin	S024	Mid	Immature-6	28.7	0.5905
T014	Peropsin	S025	Hind	Mature-1	32.305	0.05256
T014	Peropsin	S026	Hind	Mature-2	31.31	0.1123
T014	Peropsin	S027	Hind	Mature-3	33.2	0.03269
T014	Peropsin	S028	Hind	Mature-4	31.97	0.05933
T014	Peropsin	S029	Hind	Mature-5	30.93	0.1207
T014	Peropsin	S030	Hind	Mature-6	32.88	0.02787
T014	Peropsin	S031	Hind	Immature-1	30.61	0.1051
T014	Peropsin	S032	Hind	Immature-2	30.11	0.1534
T014	Peropsin	S033	Hind	Immature-3	31.025	0.08362
T014	Peropsin	S034	Hind	Immature-4	30.44	0.1615
T014	Peropsin	S035	Hind	Immature-5	32.425	0.04123
T014	Peropsin	S036	Hind	Immature-6	34.31	0.0118
T015	SWS2	S001	Fore	Mature-1	27.865	1.333
T015	SWS2	S002	Fore	Mature-2	27.335	1.227
T015	SWS2	S003	Fore	Mature-3	26.945	1.892
T015	SWS2	S004	Fore	Mature-4	27.575	0.6462
T015	SWS2	S005	Fore	Mature-5	28.34	0.6351
T015	SWS2	S006	Fore	Mature-6	28.715	0.366
T015	SWS2	S007	Fore	Immature-1	31.47	0.05201
T015	SWS2	S008	Fore	Immature-2	31.03	0.09876
T015	SWS2	S009	Fore	Immature-3	30.59	0.122
T015	SWS2	S010	Fore	Immature-4	30.165	0.2066
T015	SWS2	S011	Fore	Immature-5	31.23	0.1077
T015	SWS2	S012	Fore	Immature-6	30.21	0.5052
T015	SWS2	S013	Mid	Mature-1	27.915	1.641
T015	SWS2	S014	Mid	Mature-2	27.96	1.459
T015	SWS2	S015	Mid	Mature-3	27.755	1.301
T015	SWS2	S016	Mid	Mature-4	28.7	0.838
T015	SWS2	S017	Mid	Mature-5	28.83	0.5123
T015	SWS2	S018	Mid	Mature-6	27.89	0.6902
T015	SWS2	S019	Mid	Immature-1	31.375	0.05975
T015	SWS2	S020	Mid	Immature-2	31.07	0.1005
T015	SWS2	S021	Mid	Immature-3	30.08	0.1466
T015	SWS2	S022	Mid	Immature-4	30.065	0.2031
T015	SWS2	S023	Mid	Immature-5	30.005	0.2615
T015	SWS2	S024	Mid	Immature-6	30.13	0.2698
T015	SWS2	S025	Hind	Mature-1	28.03	1.253
T015	SWS2	S026	Hind	Mature-2	28.72	0.8322
T015	SWS2	S027	Hind	Mature-3	29.385	0.5664
T015	SWS2	S028	Hind	Mature-4	29.98	0.2902
T015	SWS2	S029	Hind	Mature-5	28.985	0.5724
T015	SWS2	S030	Hind	Mature-6	29.895	0.2717
T015	SWS2	S031	Hind	Immature-1	31.24	0.08362
T015	SWS2	S032	Hind	Immature-2	30.98	0.1033
T015	SWS2	S033	Hind	Immature-3	30.37	0.1621
T015	SWS2	S034	Hind	Immature-4	30.185	0.2373
T015	SWS2	S035	Hind	Immature-5	30.46	0.1982
T015	SWS2	S036	Hind	Immature-6	32.98	0.03652
T002	TMT1	S001	Fore	Mature-1	34.59	0.1203
T002	TMT1	S002	Fore	Mature-2	33.255	0.1934
T002	TMT1	S003	Fore	Mature-3	31.64	0.6974
T002	TMT1	S004	Fore	Mature-4	32.56	0.1948
T002	TMT1	S005	Fore	Mature-5	32.6	0.3164
T002	TMT1	S006	Fore	Mature-6	33.785	0.104
T002	TMT1	S007	Fore	Immature-1	32.475	0.2474
T002	TMT1	S008	Fore	Immature-2	34.165	0.1073
T002	TMT1	S009	Fore	Immature-3	31.585	0.5844
T002	TMT1	S010	Fore	Immature-4	32.715	0.3368
T002	TMT1	S011	Fore	Immature-5	33.795	0.1737
T002	TMT1	S012	Fore	Immature-6	33.48	0.5
T002	TMT1	S013	Mid	Mature-1	32.335	0.732
T002	TMT1	S014	Mid	Mature-2	31.98	0.8586
T002	TMT1	S015	Mid	Mature-3	30.695	1.619
T002	TMT1	S016	Mid	Mature-4	31.84	0.9075
T002	TMT1	S017	Mid	Mature-5	31.605	0.7145
T002	TMT1	S018	Mid	Mature-6	30.2	1.329
T002	TMT1	S019	Mid	Immature-1	31.11	0.6854
T002	TMT1	S020	Mid	Immature-2	32.305	0.4075
T002	TMT1	S021	Mid	Immature-3	30.965	0.7579
T002	TMT1	S022	Mid	Immature-4	31.235	0.8615
T002	TMT1	S023	Mid	Immature-5	31.005	1.248
T002	TMT1	S024	Mid	Immature-6	31.795	0.8123
T002	TMT1	S025	Hind	Mature-1	34.235	0.1621
T002	TMT1	S026	Hind	Mature-2	33.795	0.2357
T002	TMT1	S027	Hind	Mature-3	33.48	0.3164
T002	TMT1	S028	Hind	Mature-4	34.245	0.1441
T002	TMT1	S029	Hind	Mature-5	32.955	0.3487
T002	TMT1	S030	Hind	Mature-6	32.895	0.3242
T002	TMT1	S031	Hind	Immature-1	33.92	0.1246
T002	TMT1	S032	Hind	Immature-2	33.5	0.1719
T002	TMT1	S033	Hind	Immature-3	33.555	0.1702
T002	TMT1	S034	Hind	Immature-4	33.47	0.2325
T002	TMT1	S035	Hind	Immature-5	33.48	0.2333
T002	TMT1	S036	Hind	Immature-6	36.8	0.02469
T003	TMT2	S001	Fore	Mature-1	31.43	0.1934
T003	TMT2	S002	Fore	Mature-2	29.43	0.4931
T003	TMT2	S003	Fore	Mature-3	29.3	0.6351
T003	TMT2	S004	Fore	Mature-4	30.285	0.1696
T003	TMT2	S005	Fore	Mature-5	30.315	0.2774
T003	TMT2	S006	Fore	Mature-6	30.29	0.211
T003	TMT2	S007	Fore	Immature-1	28.78	0.5763
T003	TMT2	S008	Fore	Immature-2	29.24	0.5864
T003	TMT2	S009	Fore	Immature-3	28.48	0.9044
T003	TMT2	S010	Fore	Immature-4	29.335	0.6307
T003	TMT2	S011	Fore	Immature-5	29.73	0.523
T003	TMT2	S012	Fore	Immature-6	30.38	0.7711
T003	TMT2	S013	Mid	Mature-1	30.67	0.4175
T003	TMT2	S014	Mid	Mature-2	29.21	1.053
T003	TMT2	S015	Mid	Mature-3	29.245	0.7955
T003	TMT2	S016	Mid	Mature-4	30.94	0.3046
T003	TMT2	S017	Mid	Mature-5	30.415	0.2932
T003	TMT2	S018	Mid	Mature-6	29.065	0.5249
T003	TMT2	S019	Mid	Immature-1	28.25	0.895
T003	TMT2	S020	Mid	Immature-2	29.51	0.5087
T003	TMT2	S021	Mid	Immature-3	27.725	1.288
T003	TMT2	S022	Mid	Immature-4	28.89	0.7873
T003	TMT2	S023	Mid	Immature-5	30.085	0.4248
T003	TMT2	S024	Mid	Immature-6	30.225	0.4338
T003	TMT2	S025	Hind	Mature-1	30.825	0.3099
T003	TMT2	S026	Hind	Mature-2	29.96	0.605
T003	TMT2	S027	Hind	Mature-3	31.16	0.2842
T003	TMT2	S028	Hind	Mature-4	32.065	0.1174
T003	TMT2	S029	Hind	Mature-5	32.01	0.1207
T003	TMT2	S030	Hind	Mature-6	31.075	0.2059
T003	TMT2	S031	Hind	Immature-1	31.035	0.1655
T003	TMT2	S032	Hind	Immature-2	31.905	0.09343
T003	TMT2	S033	Hind	Immature-3	29.06	0.6902
T003	TMT2	S034	Hind	Immature-4	30.18	0.409
T003	TMT2	S035	Hind	Immature-5	33.72	0.03553
T003	TMT2	S036	Hind	Immature-6	32.59	0.08218
T004	TMT3	S001	Fore	Mature-1	29.29	0.5123
T004	TMT3	S002	Fore	Mature-2	29.86	0.2199
T004	TMT3	S003	Fore	Mature-3	28.94	0.4897
T004	TMT3	S004	Fore	Mature-4	28.575	0.3333
T004	TMT3	S005	Fore	Mature-5	29.65	0.2643
T004	TMT3	S006	Fore	Mature-6	29.785	0.1799
T004	TMT3	S007	Fore	Immature-1	29.495	0.211
T004	TMT3	S008	Fore	Immature-2	29.73	0.2509
T004	TMT3	S009	Fore	Immature-3	30.46	0.1377
T004	TMT3	S010	Fore	Immature-4	30.61	0.1566
T004	TMT3	S011	Fore	Immature-5	28.49	0.7423
T004	TMT3	S012	Fore	Immature-6	29.49	0.8586
T004	TMT3	S013	Mid	Mature-1	29.48	0.5724
T004	TMT3	S014	Mid	Mature-2	29.17	0.6507
T004	TMT3	S015	Mid	Mature-3	26.99	2.282
T004	TMT3	S016	Mid	Mature-4	28.645	0.8981
T004	TMT3	S017	Mid	Mature-5	28.595	0.622
T004	TMT3	S018	Mid	Mature-6	28.34	0.5212
T004	TMT3	S019	Mid	Immature-1	28.705	0.3923
T004	TMT3	S020	Mid	Immature-2	28.665	0.549
T004	TMT3	S021	Mid	Immature-3	27.875	0.6974
T004	TMT3	S022	Mid	Immature-4	27.595	1.161
T004	TMT3	S023	Mid	Immature-5	28.155	0.9727
T004	TMT3	S024	Mid	Immature-6	28.825	0.6878
T004	TMT3	S025	Hind	Mature-1	29.405	0.4983
T004	TMT3	S026	Hind	Mature-2	28.735	0.8497
T004	TMT3	S027	Hind	Mature-3	27.84	1.705
T004	TMT3	S028	Hind	Mature-4	29.19	0.5176
T004	TMT3	S029	Hind	Mature-5	28.575	0.7846
T004	TMT3	S030	Hind	Mature-6	29.29	0.4263
T004	TMT3	S031	Hind	Immature-1	29.26	0.3403
T004	TMT3	S032	Hind	Immature-2	29.75	0.25
T004	TMT3	S033	Hind	Immature-3	30.535	0.1492
T004	TMT3	S034	Hind	Immature-4	30.34	0.2199
T004	TMT3	S035	Hind	Immature-5	29.31	0.4538
T004	TMT3	S036	Hind	Immature-6	30.42	0.2222
T005	VA-opsin	S001	Fore	Mature-1	31.945	0.1387
T005	VA-opsin	S002	Fore	Mature-2	32.355	0.06652
T005	VA-opsin	S003	Fore	Mature-3	30.05	0.3869
T005	VA-opsin	S004	Fore	Mature-4	31.555	0.07204
T005	VA-opsin	S005	Fore	Mature-5	33.385	0.03384
T005	VA-opsin	S006	Fore	Mature-6	32.525	0.04591
T005	VA-opsin	S007	Fore	Immature-1	31.115	0.117
T005	VA-opsin	S008	Fore	Immature-2	31.285	0.1456
T005	VA-opsin	S009	Fore	Immature-3	30.88	0.1756
T005	VA-opsin	S010	Fore	Immature-4	33.05	0.04921
T005	VA-opsin	S011	Fore	Immature-5	31.74	0.133
T005	VA-opsin	S012	Fore	Immature-6	34.36	0.05007
T005	VA-opsin	S013	Mid	Mature-1	29.635	0.8766
T005	VA-opsin	S014	Mid	Mature-2	29.845	0.695
T005	VA-opsin	S015	Mid	Mature-3	29.045	0.9363
T005	VA-opsin	S016	Mid	Mature-4	30.02	0.5905
T005	VA-opsin	S017	Mid	Mature-5	29.595	0.5303
T005	VA-opsin	S018	Mid	Mature-6	28.505	0.7928
T005	VA-opsin	S019	Mid	Immature-1	29.14	0.4948
T005	VA-opsin	S020	Mid	Immature-2	28.405	1.121
T005	VA-opsin	S021	Mid	Immature-3	27.76	1.288
T005	VA-opsin	S022	Mid	Immature-4	28.685	0.9298
T005	VA-opsin	S023	Mid	Immature-5	29.05	0.8919
T005	VA-opsin	S024	Mid	Immature-6	29.21	0.8981
T005	VA-opsin	S025	Hind	Mature-1	32.64	0.09025
T005	VA-opsin	S026	Hind	Mature-2	33.475	0.05422
T005	VA-opsin	S027	Hind	Mature-3	32.445	0.1195
T005	VA-opsin	S028	Hind	Mature-4	33.335	0.04989
T005	VA-opsin	S029	Hind	Mature-5	32.56	0.08449
T005	VA-opsin	S030	Hind	Mature-6	33.11	0.05147
T005	VA-opsin	S031	Hind	Immature-1	32.245	0.0733
T005	VA-opsin	S032	Hind	Immature-2	32.33	0.0713
T005	VA-opsin	S033	Hind	Immature-3	31.67	0.1158
T005	VA-opsin	S034	Hind	Immature-4	32.46	0.08627
T005	VA-opsin	S035	Hind	Immature-5	33.71	0.03665
T005	VA-opsin	S036	Hind	Immature-6	33.1	0.05913
