# Supplementary material for: Gene expression patterns of novel visual and non-visual opsin families in immature and mature Japanese eel males
Source: PeerJ. 2020 Feb 27;8:e8326. doi: 10.7717/peerj.8326 (PMC7049458; doi:10.7717/peerj.8326)
Supplement: File S2 [file peerj-08-8326-s003.xlsx]

## Sheet: Text Report
Target ID	Target Name	Sample ID	Sample Name	Ct Avg.(CP)	Rel.Qty(CP)
T001	Actin	S001	Immature-1	18.205	1
T001	Actin	S002	Immature-2	18.395	1
T001	Actin	S003	Immature-3	17.505	1
T001	Actin	S004	Immature-4	16.67	1
T001	Actin	S005	Immature-5	16.175	1
T001	Actin	S006	Mature-1	16.19	1
T001	Actin	S007	Mature-2	16.22	1
T001	Actin	S008	Mature-3	15.585	1
T001	Actin	S009	Mature-4	17.74	1
T001	Actin	S010	Mature-5	18.66	1
T001	Actin	S011	Mature-6	18.88	1
T002	Peropsin	S001	Immature-1	29.29	0.1392
T002	Peropsin	S002	Immature-2	28.09	0.3648
T002	Peropsin	S003	Immature-3	27.475	0.3015
T002	Peropsin	S004	Immature-4	24.315	1.51
T002	Peropsin	S005	Immature-5	24.875	0.727
T002	Peropsin	S006	Mature-1	23.825	1.521
T002	Peropsin	S007	Mature-2	24.89	0.7423
T002	Peropsin	S008	Mature-3	25.11	0.4104
T002	Peropsin	S009	Mature-4	29.5	0.08717
T002	Peropsin	S010	Mature-5	32.68	0.0182
T002	Peropsin	S011	Mature-6	34.26	0.00709
T003	DSO	S001	Immature-1	20.705	0.02393
T003	DSO	S002	Immature-2	20.25	0.03742
T003	DSO	S003	Immature-3	21.13	0.01097
T003	DSO	S004	Immature-4	24.885	0.0004556
T003	DSO	S005	Immature-5	19.025	0.01878
T003	DSO	S006	Mature-1	13.18	1.091
T003	DSO	S007	Mature-2	12.7	1.553
T003	DSO	S008	Mature-3	13.1	0.7579
T003	DSO	S009	Mature-4	16.785	0.2624
T003	DSO	S010	Mature-5	18.115	0.1975
T003	DSO	S011	Mature-6	18.475	0.1792
T004	FWO	S001	Immature-1	15.03	4.874
T004	FWO	S002	Immature-2	15.885	3.074
T004	FWO	S003	Immature-3	15.825	1.729
T004	FWO	S004	Immature-4	14.695	2.121
T004	FWO	S005	Immature-5	14.935	1.275
T004	FWO	S006	Mature-1	24.99	0.001211
T004	FWO	S007	Mature-2	22.18	0.008669
T004	FWO	S008	Mature-3	23.335	0.002507
T004	FWO	S009	Mature-4	28.76	0.0002599
T004	FWO	S010	Mature-5	27.08	0.001575
T004	FWO	S011	Mature-6	28.23	0.0008269
T005	Rh2	S001	Immature-1	20.05	1.619
T005	Rh2	S002	Immature-2	20.625	1.24
T005	Rh2	S003	Immature-3	21.01	0.5123
T005	Rh2	S004	Immature-4	19.545	0.7928
T005	Rh2	S005	Immature-5	18.125	1.505
T005	Rh2	S006	Mature-1	19.33	0.6598
T005	Rh2	S007	Mature-2	18.62	1.102
T005	Rh2	S008	Mature-3	20.345	0.2146
T005	Rh2	S009	Mature-4	23.64	0.0974
T005	Rh2	S010	Mature-5	25.125	0.06584
T005	Rh2	S011	Mature-6	29.145	0.004727
T006	Exo-Rhod	S001	Immature-1	36.05	0.7096
T006	Exo-Rhod	S002	Immature-2	35.69	1.039
T006	Exo-Rhod	S003	Immature-3	34.98	0.917
T006	Exo-Rhod	S004	Immature-4	33.23	1.729
T006	Exo-Rhod	S005	Immature-5	33.65	0.917
T006	Exo-Rhod	S006	Mature-1	33.795	0.838
T006	Exo-Rhod	S007	Mature-2	32.935	1.553
T006	Exo-Rhod	S008	Mature-3	33.505	0.6736
T006	Exo-Rhod	S009	Mature-4	35.77	0.6242
T006	Exo-Rhod	S010	Mature-5	36.91	0.5359
T006	Exo-Rhod	S011	Mature-6	36.59	0.7792
T007	SWS2	S001	Immature-1	25.315	1.165
T007	SWS2	S002	Immature-2	24.54	2.274
T007	SWS2	S003	Immature-3	25.285	0.732
T007	SWS2	S004	Immature-4	24.205	0.8675
T007	SWS2	S005	Immature-5	24.4	0.5377
T007	SWS2	S006	Mature-1	24.385	0.549
T007	SWS2	S007	Mature-2	22.915	1.553
T007	SWS2	S008	Mature-3	24.015	0.4665
T007	SWS2	S009	Mature-4	25.85	0.5824
T007	SWS2	S010	Mature-5	28.265	0.2066
T007	SWS2	S011	Mature-6	27.11	0.5359
T008	Opn3	S001	Immature-1	32.23	0.1285
T008	Opn3	S002	Immature-2	33.345	0.06769
T008	Opn3	S003	Immature-3	30.575	0.2491
T008	Opn3	S004	Immature-4	29.07	0.3964
T008	Opn3	S005	Immature-5	27.405	0.8919
T008	Opn3	S006	Mature-1	26.65	1.521
T008	Opn3	S007	Mature-2	27.45	0.8919
T008	Opn3	S008	Mature-3	28.91	0.2088
T008	Opn3	S009	Mature-4	33.23	0.04655
T008	Opn3	S010	Mature-5	39.31	0.001302
T008	Opn3	S011	Mature-6	--	--
T009	Parapinopsin	S001	Immature-1	29.615	0.8796
T009	Parapinopsin	S002	Immature-2	32.585	0.1281
T009	Parapinopsin	S003	Immature-3	30.525	0.2882
T009	Parapinopsin	S004	Immature-4	30.77	0.1363
T009	Parapinopsin	S005	Immature-5	26.81	1.505
T009	Parapinopsin	S006	Mature-1	27.63	0.8615
T009	Parapinopsin	S007	Mature-2	27.44	1.003
T009	Parapinopsin	S008	Mature-3	28.48	0.3143
T009	Parapinopsin	S009	Mature-4	33.035	0.05954
T009	Parapinopsin	S010	Mature-5	32.365	0.1792
T009	Parapinopsin	S011	Mature-6	36.435	0.01243
T010	VA-opsin	S001	Immature-1	32.48	0.2357
T010	VA-opsin	S002	Immature-2	32.515	0.2624
T010	VA-opsin	S003	Immature-3	31.045	0.3923
T010	VA-opsin	S004	Immature-4	27.775	2.121
T010	VA-opsin	S005	Immature-5	28.3	1.046
T010	VA-opsin	S006	Mature-1	28.775	0.7605
T010	VA-opsin	S007	Mature-2	28.61	0.8705
T010	VA-opsin	S008	Mature-3	29.8	0.2457
T010	VA-opsin	S009	Mature-4	33.29	0.0974
T010	VA-opsin	S010	Mature-5	36.315	0.02264
T010	VA-opsin	S011	Mature-6	36.8	0.01884
T011	Opn4m2	S001	Immature-1	27.825	0.08538
T011	Opn4m2	S002	Immature-2	28.43	0.06403
T011	Opn4m2	S003	Immature-3	25.27	0.3089
T011	Opn4m2	S004	Immature-4	23.89	0.4506
T011	Opn4m2	S005	Immature-5	21.655	1.505
T011	Opn4m2	S006	Mature-1	24.42	0.2238
T011	Opn4m2	S007	Mature-2	23.86	0.3368
T011	Opn4m2	S008	Mature-3	24.185	0.1731
T011	Opn4m2	S009	Mature-4	32.55	0.002339
T011	Opn4m2	S010	Mature-5	33.15	0.00292
T011	Opn4m2	S011	Mature-6	--	--
T012	Opn5	S001	Immature-1	34.445	0.1441
T012	Opn5	S002	Immature-2	33.965	0.2293
T012	Opn5	S003	Immature-3	33.385	0.1849
T012	Opn5	S004	Immature-4	30.535	0.7474
T012	Opn5	S005	Immature-5	31.985	0.1941
T012	Opn5	S006	Mature-1	29.03	1.521
T012	Opn5	S007	Mature-2	29.255	1.329
T012	Opn5	S008	Mature-3	29.765	0.6008
T012	Opn5	S009	Mature-4	34.525	0.09876
T012	Opn5	S010	Mature-5	36.255	0.05633
T012	Opn5	S011	Mature-6	37.67	0.0246
T013	Opn5-like	S001	Immature-1	33.56	0.3057
T013	Opn5-like	S002	Immature-2	33.34	0.4061
T013	Opn5-like	S003	Immature-3	32.465	0.4019
T013	Opn5-like	S004	Immature-4	30.44	0.917
T013	Opn5-like	S005	Immature-5	31.38	0.3392
T013	Opn5-like	S006	Mature-1	29.23	1.521
T013	Opn5-like	S007	Mature-2	30.46	0.662
T013	Opn5-like	S008	Mature-3	29.435	0.8675
T013	Opn5-like	S009	Mature-4	33.725	0.1975
T013	Opn5-like	S010	Mature-5	35.51	0.1084
T013	Opn5-like	S011	Mature-6	34.54	0.2474
T014	Opn4x1	S001	Immature-1	32.41	0.6439
T014	Opn4x1	S002	Immature-2	--	--
T014	Opn4x1	S003	Immature-3	--	--
T014	Opn4x1	S004	Immature-4	--	--
T014	Opn4x1	S005	Immature-5	30.32	0.6713
T014	Opn4x1	S006	Mature-1	34.835	0.02967
T014	Opn4x1	S007	Mature-2	32.425	0.161
T014	Opn4x1	S008	Mature-3	29.155	1
T014	Opn4x1	S009	Mature-4	34.055	0.1492
T014	Opn4x1	S010	Mature-5	--	--
T014	Opn4x1	S011	Mature-6	37.56	0.02896
T015	Opn4x2	S001	Immature-1	30.13	1.121
T015	Opn4x2	S002	Immature-2	30.245	1.181
T015	Opn4x2	S003	Immature-3	29.57	1.017
T015	Opn4x2	S004	Immature-4	29.31	0.683
T015	Opn4x2	S005	Immature-5	28.875	0.6552
T015	Opn4x2	S006	Mature-1	27.675	1.521
T015	Opn4x2	S007	Mature-2	28.32	0.9931
T015	Opn4x2	S008	Mature-3	27.76	0.9428
T015	Opn4x2	S009	Mature-4	31.34	0.3511
T015	Opn4x2	S010	Mature-5	32.04	0.409
T015	Opn4x2	S011	Mature-6	32.07	0.4665
T016	Opn4m1	S001	Immature-1	29.8	0.09087
T016	Opn4m1	S002	Immature-2	29.485	0.129
T016	Opn4m1	S003	Immature-3	27.93	0.2045
T016	Opn4m1	S004	Immature-4	25.19	0.7658
T016	Opn4m1	S005	Immature-5	24.955	0.6395
T016	Opn4m1	S006	Mature-1	23.72	1.521
T016	Opn4m1	S007	Mature-2	24.2	1.113
T016	Opn4m1	S008	Mature-3	23.96	0.8467
T016	Opn4m1	S009	Mature-4	29.43	0.08508
T016	Opn4m1	S010	Mature-5	32.115	0.02503
T016	Opn4m1	S011	Mature-6	33.845	0.00879
T017	TMT1	S001	Immature-1	33.59	0.1684
T017	TMT1	S002	Immature-2	33.915	0.1534
T017	TMT1	S003	Immature-3	32.49	0.2222
T017	TMT1	S004	Immature-4	30.48	0.5017
T017	TMT1	S005	Immature-5	30.575	0.3333
T017	TMT1	S006	Mature-1	28.4	1.521
T017	TMT1	S007	Mature-2	29.21	0.8858
T017	TMT1	S008	Mature-3	29.235	0.5606
T017	TMT1	S009	Mature-4	34.135	0.08362
T017	TMT1	S010	Mature-5	34.85	0.09639
T017	TMT1	S011	Mature-6	36.69	0.03136
T018	TMT2	S001	Immature-1	30.485	0.113
T018	TMT2	S002	Immature-2	28.72	0.4383
T018	TMT2	S003	Immature-3	29.38	0.1497
T018	TMT2	S004	Immature-4	26.74	0.523
T018	TMT2	S005	Immature-5	26.415	0.4649
T018	TMT2	S006	Mature-1	25.32	1.003
T018	TMT2	S007	Mature-2	24.72	1.553
T018	TMT2	S008	Mature-3	25.4	0.6242
T018	TMT2	S009	Mature-4	30.215	0.09876
T018	TMT2	S010	Mature-5	30.495	0.1539
T018	TMT2	S011	Mature-6	31.095	0.1183
T019	TMT3	S001	Immature-1	37.42	0.4931
T019	TMT3	S002	Immature-2	--	--
T019	TMT3	S003	Immature-3	--	--
T019	TMT3	S004	Immature-4	--	--
T019	TMT3	S005	Immature-5	33.78	1.505
T019	TMT3	S006	Mature-1	35.4	0.4948
T019	TMT3	S007	Mature-2	36.82	0.1888
T019	TMT3	S008	Mature-3	--	--
T019	TMT3	S009	Mature-4	35.66	1.21
T019	TMT3	S010	Mature-5	--	--
T019	TMT3	S011	Mature-6	--	--
