# Supplementary material for: Gene expression patterns of novel visual and non-visual opsin families in immature and mature Japanese eel males
Source: PeerJ. 2020 Feb 27;8:e8326. doi: 10.7717/peerj.8326 (PMC7049458; doi:10.7717/peerj.8326)
Supplement: File S3 [file peerj-08-8326-s004.xlsx]

## Sheet: Sheet1
		No.	Body weight (g)	Total length (cm)	Gonad weight (g)	Gonadosomatic index (GSI)
	Immature	1	208.58	51.5	0.42	0.201362
		2	186.1	47.2	0.34	0.182697
		3	227.1	51.7	0.52	0.228974
		4	197.8	49.4	0.42	0.212336
		5	221.2	51	0.5	0.22604
		6	221.8	50.7	0.3	0.135257
		NO				6
		AVE				0.197778
		SD				0.0350228
		SEM				0.014298
		No.	Body weight (g)	Total length (cm)	Gonad weight (g)	Gonadosomatic index (GSI)
	Matura	1	344	62.5	93.33	27.1308
		2	403	65	120	29.7767
		3	345	60.1	72.24	20.9391
		4	367	61	86.35	23.5286
		5	286	58	81.92	28.6434
		6	382	63	93.23	24.4058
		NO				6
		AVE				25.7374
		SD				3.3579
		SEM				1.37086
